# Supplementary material for: Optimization, Validation and Application of HPLC-PDA Methods for Quantification of Triterpenoids in Vaccinium vitis-idaea L
Source: MDPI journal article supplement (doi:10.3390/molecules26061645), 2021-03-16
Supplement: s1 [file s1]

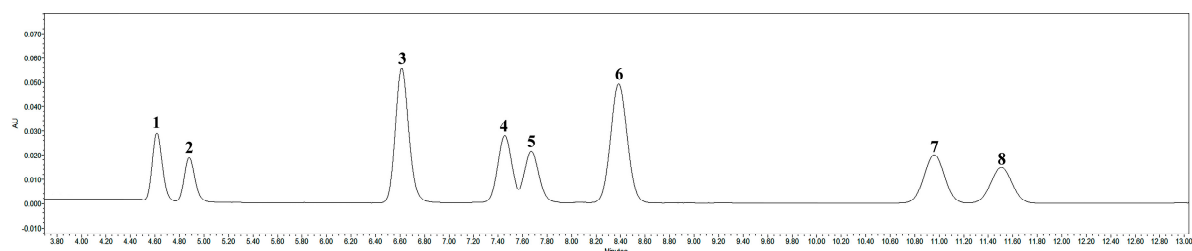

**Figure S1.** HPLC-PDA chromatogram ( $\lambda = 205$  nm) of the standard mixture, showing the separation of triterpenoid acids and neutral triterpenoids with chromophores, at a column temperature of 30 °C. Peak assignments: 1—maslinic acid, 2—corosolic acid, 3—betulinic acid, 4—oleanolic acid, 5—ursolic acid, 6—betulin, 7—erythrodiol, 8—uvaol.

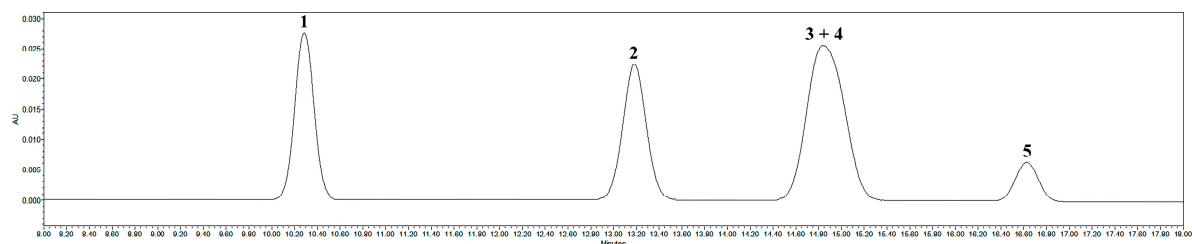

**Figure S2.** HPLC-PDA chromatogram ( $\lambda = 205$  nm) of the standard mixture, showing the separation of phytosterol and neutral triterpenoids, which lack chromophores, at a column temperature of 25 °C. Peak assignments: 1—lupeol, 2— $\beta$ -amyirin, 3— $\beta$ -sitosterol, 4— $\alpha$ -amyirin, 5—friedelin.

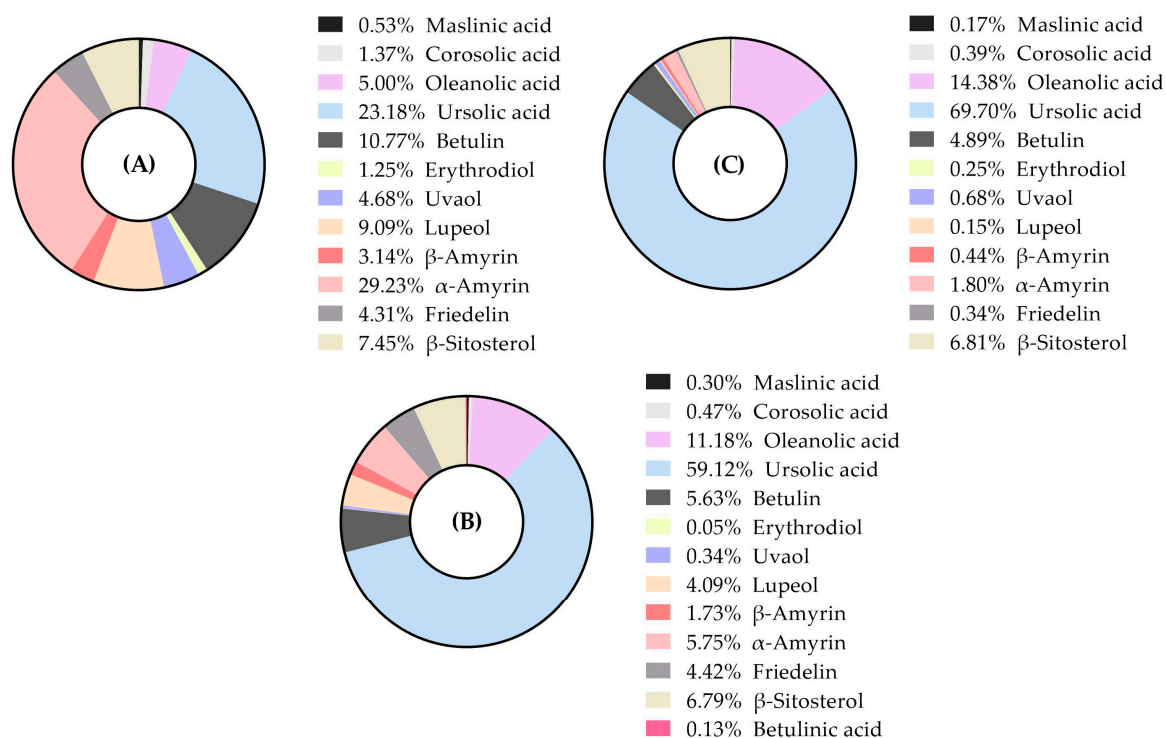

**Figure S3.** Content of identified triterpenoids (% W/DW) in extracts of lingonberry leaves (A), fruits (B), and flowers (C).
